# Supplementary material
Source: PubMed Central journal article supplement (PMC2495041)

SopE<sub>78-240</sub>

Cdc42

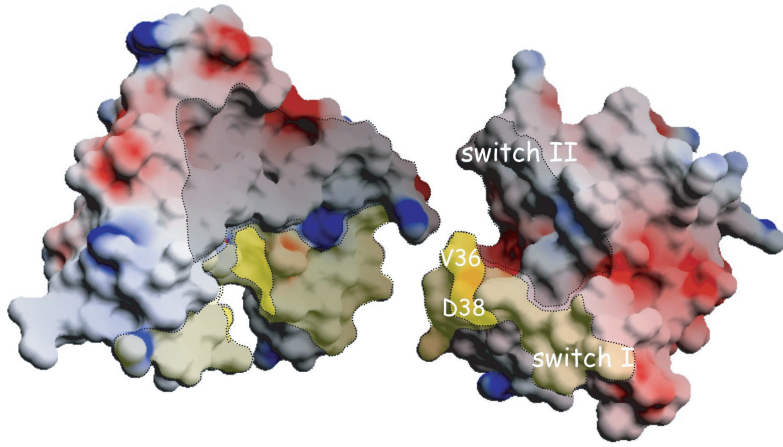

Supplement: NIHMS2112-supplement-2.pdf [file NIHMS2112-supplement-2.pdf]
